# Supplementary material for: The Influence of the Hydroxyl Type on Crosslinking Process in Cyclodextrin Based Polyurethane Networks
Source: MDPI journal article supplement (doi:10.3390/gels8060348), 2022-06-02
Supplement: s1 [file s1]

## The influence of the hydroxyl type on crosslinking process in cyclodextrin based polyurethane networks

Cristian Peptu<sup>\*1</sup>, Alexandra-Diana Diaconu<sup>1</sup>, Maricel Danu<sup>2</sup>, Catalina A. Peptu<sup>2</sup>, Mariana Cristea<sup>1</sup>, Valeria Harabagiu<sup>\*1</sup>

<sup>1</sup> Petru Poni" Institute of Macromolecular Chemistry, Aleea Grigore Ghica Voda 41A, 700487 Iași, Romania;

<sup>2</sup> "Gheorghe Asachi" Technical University of Iași, 700050 Iași, Romania

\* Correspondence: CP cristian.peptu@icmpp.ro; VH hvaleria@icmpp.ro

### Contents:

- CDLA characterization - **Figs. S1** - page S2
- Synthesis of PEG-(NCO)<sub>2</sub> – **Scheme S1**– page S3
- FTIR spectra of hydrogels – **Fig. S3** – page S4
- The degradation curves for CDLA, PEG, hydrogels G, hydrogels B – **Figs. S3-S16, Table S31** – pages S5-S9
- Dependence of swelling degree on temperature – **Fig. S7** – page S10
- Degradation of hydrogels – **Figs. S8, S9** – pages S11, S12
- References – page S13

## CDLA synthesis and characterization

In the MALDI-MS spectrum of CDLA product employed in our study, presented in **Figure 1**, there may be observed two types of peaks: a series of intense peaks, with a difference between two consecutive peaks of 144 Da, corresponding to one lactide unit (or 2 lactate units) and a second series of peaks, of lower intensity, located between the more intense peaks, at a difference of 72 Da from the neighboring peaks. The high intensity peaks represent CDLA species with  $m/z = 1134 (\beta\text{-CD}) + n \cdot 144 (\text{bi-lactate}) + 23 (\text{Na})$  and the low intensity peaks represent also CDLA species with  $m/z = 1134 (\beta\text{-CD}) + n \cdot 72 (\text{lactate}) + 23 (\text{Na})$ , where  $n$  has odd values.

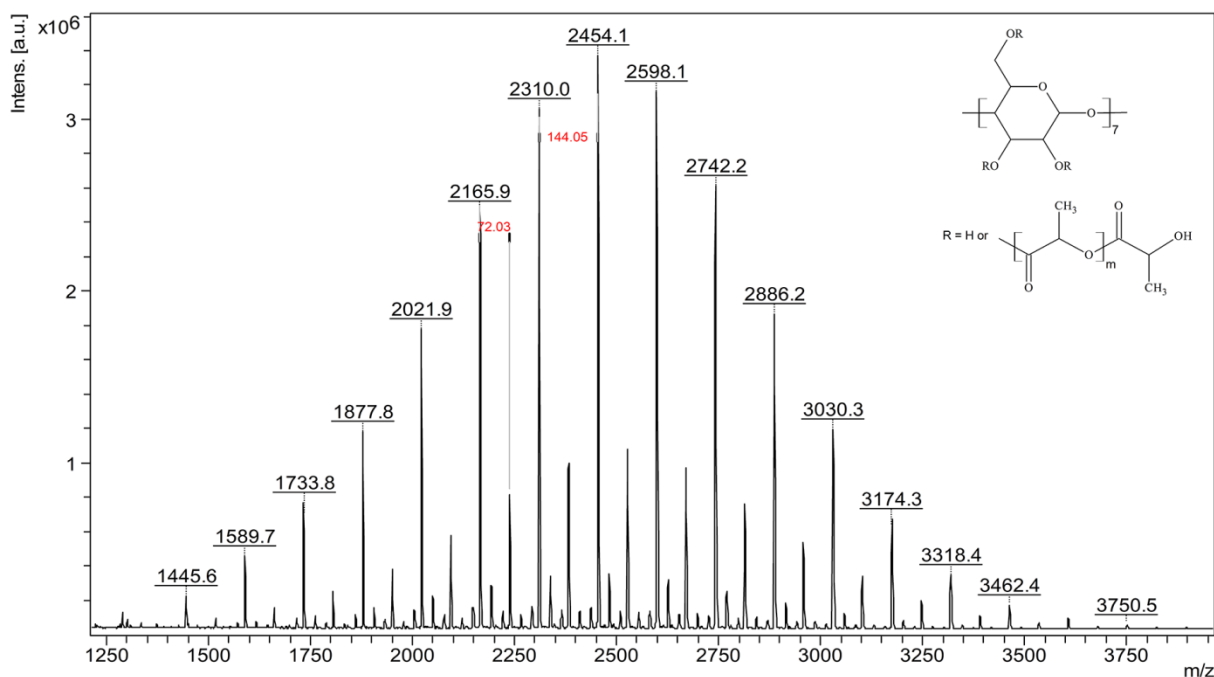

**Figure S1.** MALDI MS spectrum of CDLA

Based on the acquired MS spectrum it was possible to determine the numerical average molecular weight,  $M_n = 2443$  g/mol, the gravimetric average molecular weight,  $M_w = 2526$  g/mol, and the dispersity index,  $\bar{D} = 1.033$ . This is corresponding to a CDLA product with approximately 8 units of LA, covalently linked to CD.

### **Synthesis of PEG-(NCO)<sub>2</sub>**

**Scheme S1** shows the reaction between PEG and IPDI with the formation of the desired compound (PEG-(NCO)<sub>2</sub>), 2 molecules of IPDI bound to a molecule of PEG (functionalized PEG containing 2 isocyanate groups, required for the subsequent cross linking reaction).

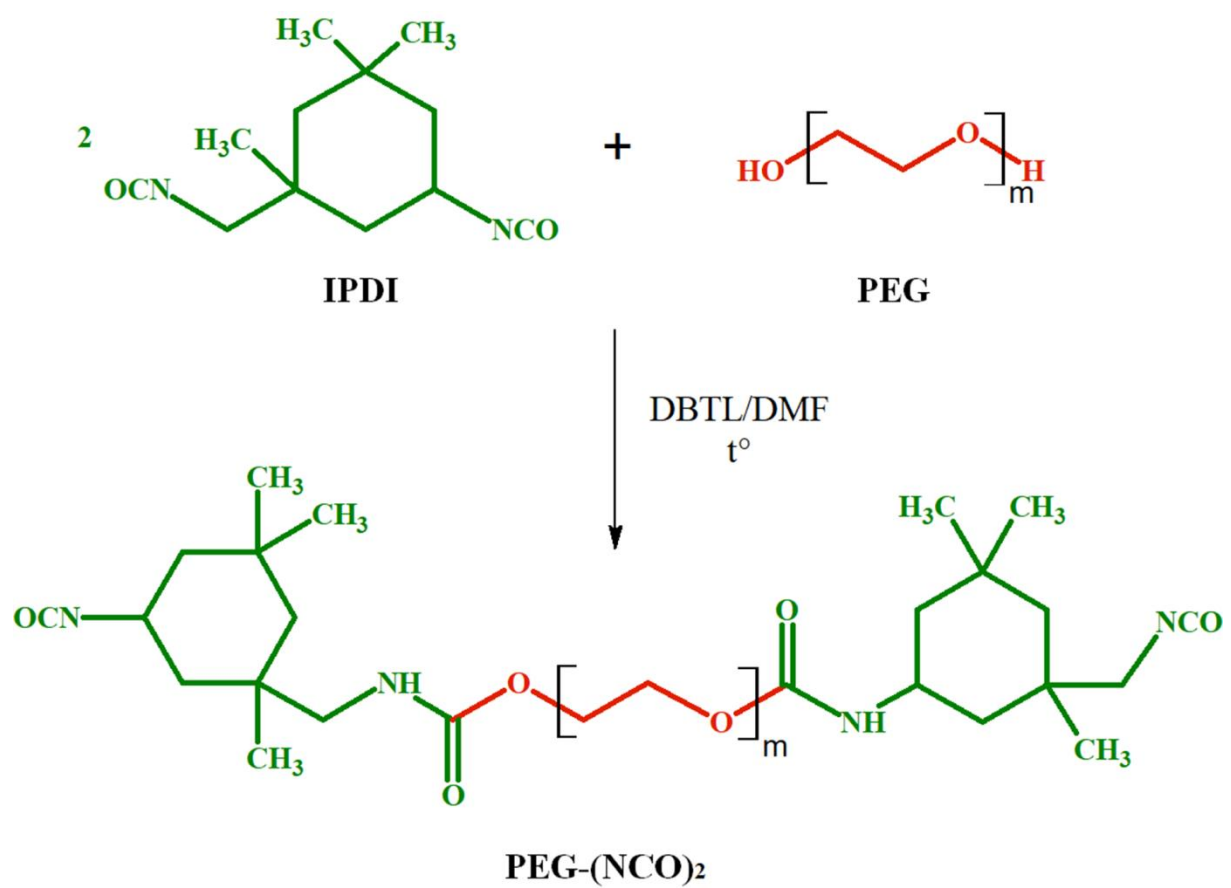

**Scheme S1.** Synthesis of PEG-(NCO)<sub>2</sub> prepolymer

FTIR spectra of hydrogels

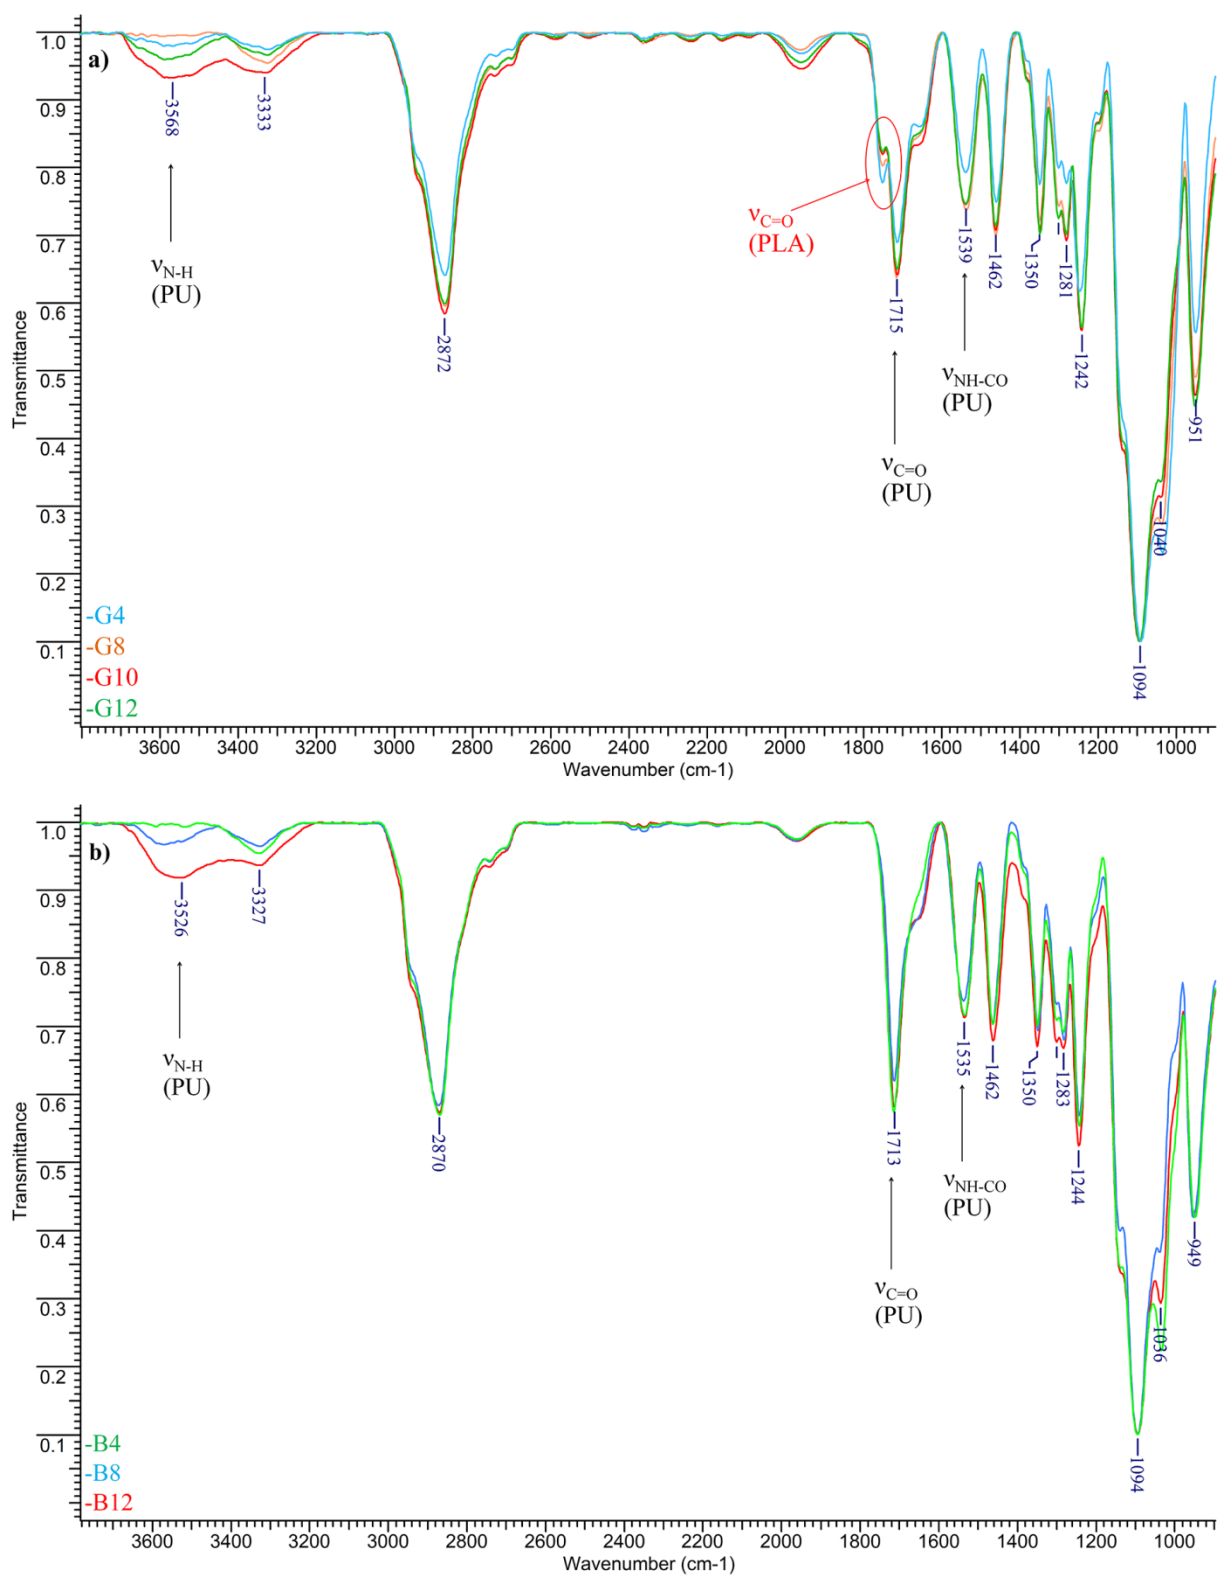

**Figure S2.** FTIR spectra of CDLA-PEG (a) and CD-PEG (b)

**The thermal degradation curves**

Usually, thermal degradation of  $\beta$ -CD occurs in two steps. The first region corresponds to water vaporization (60-100 °C or even above 100 °C), while the second region is attributed to the decomposition of cyclodextrin itself ( $T > 270$  °C) [2,3]. **Figure S3** depicts the thermal behavior of the CDLA synthesized in the first stage of the reaction and details are found in the **Table S1**.

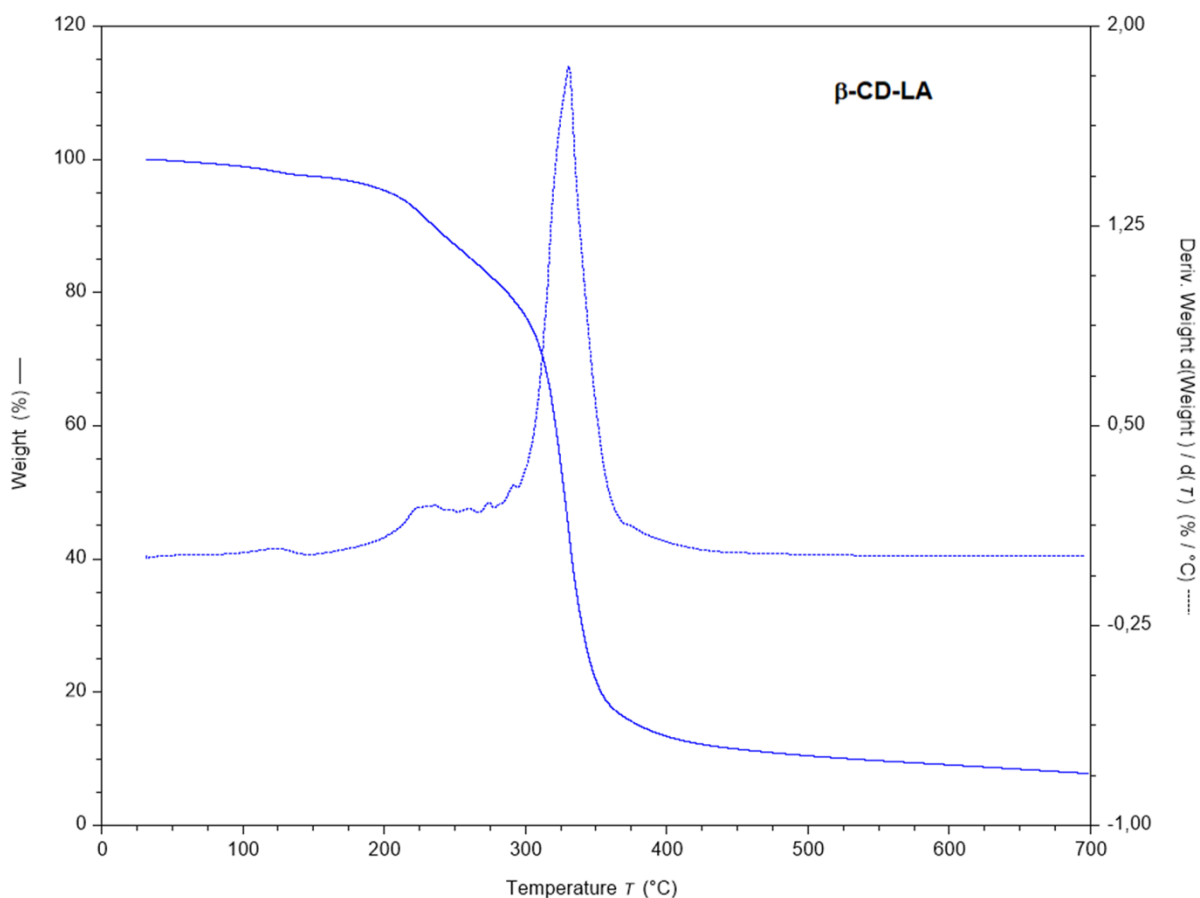

**Figure S3.** The degradation curves for the CDLA precursor

The onset of thermal degradation of PLA depends on its nature and processing method and is reported to be around 325 °C.

The PEG used in the synthesis starts to degrade close to 400 °C (**Figure S4**, **Table S1**).

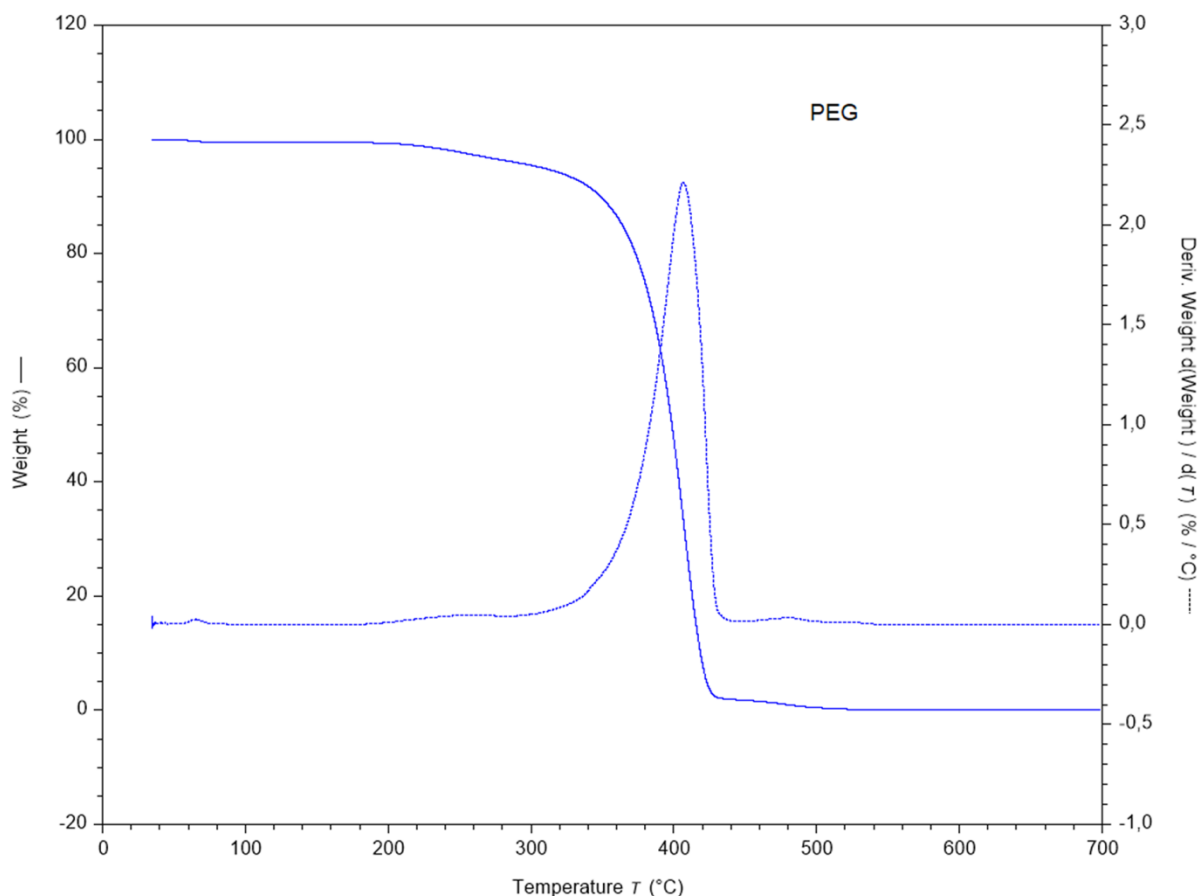

**Figure S4.** The degradation curves for the PEG used in the synthesis

The interpretation of the TGA spectra of the samples was done considering the above preliminary information.

**Table S1** contains all the degradation data for the samples B4, B8, B12, G4, G8, G10, G12, CDLA and PEG:

- the temperature range of the degradation steps and the peak of the corresponding derivative, equivalent with the maximum rate of mass loss;
- the decomposition temperatures  $T_5$  and  $T_{10}$ , that express the point where 5% and 10% of the total mass is lost from the sample; currently, the degradation temperature is considered to be  $T_5$ .

- the mass loss at 275 °C, 375 °C, 650 °C; the values of temperatures are chosen in order to reflect the behavior after the main degradation steps.

**Table S1.** Degradation data from TG and DTG curves.

| #Sampl<br>e | Degradation range |           | Peak  | T <sub>5</sub> | T <sub>10</sub> | weight loss (%) |        |        |
|-------------|-------------------|-----------|-------|----------------|-----------------|-----------------|--------|--------|
|             |                   | (°C)      | (°C)  | (°C)           | (°C)            | 275 °C          | 375 °C | 650 °C |
| CDLA        | Step 1            | 190 – 250 | 223.1 | <b>204.1</b>   | 235.3           | 17.46           | 84.35  | 91.56  |
|             | Step 2            | 275 - 370 | 330.8 |                |                 |                 |        |        |
| PEG         | Step 1            | 310 - 440 | 329,3 | <b>308.3</b>   | 348.7           | 3.41            | 21.18  | 99.99  |
| B4          | Step 1            | -         | -     | <b>320.2</b>   | 342.5           | 1.63            | 20.92  | 97.73  |
|             | Step 2            | 285 - 370 | 345.9 |                |                 |                 |        |        |
|             | Step 3            | 375 - 450 | 425.6 |                |                 |                 |        |        |
| B8          | Step 1            | -         | -     | <b>314.3</b>   | 334.2           | 1.17            | 18.89  | 98.51  |
|             | Step 2            | 270 - 360 | 335.0 |                |                 |                 |        |        |
|             | Step 3            | 360 - 460 | 423.3 |                |                 |                 |        |        |
| B12         | Step 1            | -         | -     | <b>319.7</b>   | 343.3           | 1.24            | 18.77  | 99.14  |
|             | Step 2            | 290 – 370 | 351.1 |                |                 |                 |        |        |
|             | Step 3            | 370 - 470 | 422.2 |                |                 |                 |        |        |
| G4          | Step 1            | 200 – 260 | 249.0 | <b>282.0</b>   | 319.2           | 4.37            | 26.1   | 98.16  |
|             | Step 2            | 267 – 375 | 344.4 |                |                 |                 |        |        |
|             | Step 3            | 375 - 460 | 422.4 |                |                 |                 |        |        |
| G8          | Step 1            | 190 – 245 | 228.2 | <b>294.8</b>   | 323.6           | 3.65            | 22.83  | 98,92  |
|             | Step 2            | 270 – 365 | 346.2 |                |                 |                 |        |        |
|             | Step 3            | 365 - 456 | 421.9 |                |                 |                 |        |        |
| G10         | Step 1            | **        | -     | <b>283.6</b>   | 316.0           | 4.38            | 25.4   | 98.6   |
|             | Step 2            | 280-361   | 334.0 |                |                 |                 |        |        |



|     |        |           |       |       |       |      |      |       |
|-----|--------|-----------|-------|-------|-------|------|------|-------|
|     | Step 3 | 369-451   | 423.5 |       |       |      |      |       |
|     | Step 1 | **        | 239.4 |       |       |      |      |       |
| G12 | Step 2 | 275 -365  | 337.4 | 287.2 | 317.0 | 4.06 | 24.4 | 98.52 |
|     | Step 3 | 365 - 450 | 424.7 |       |       |      |      |       |

\*\*faint shoulder in derivative TGA

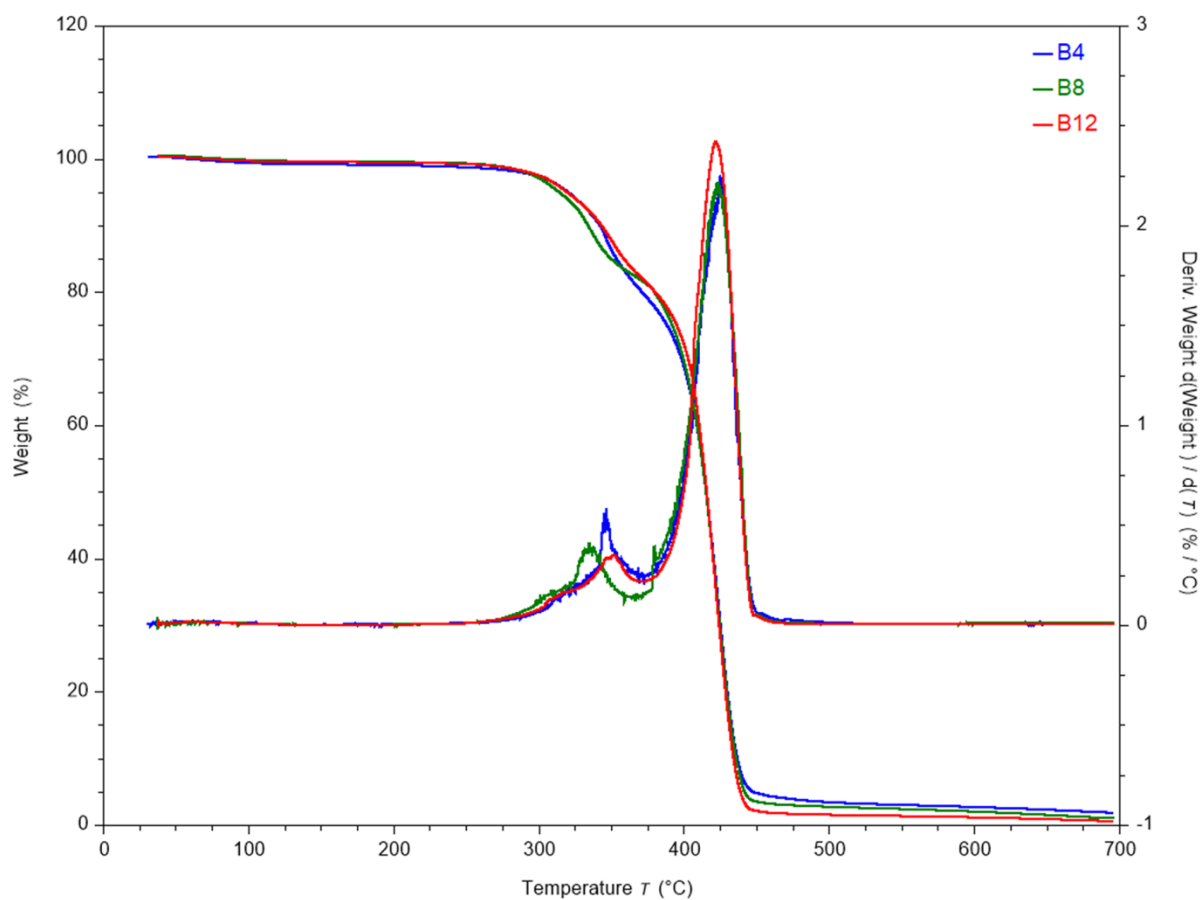

**Figure S5.** The thermal degradation curves of CD-PEG samples

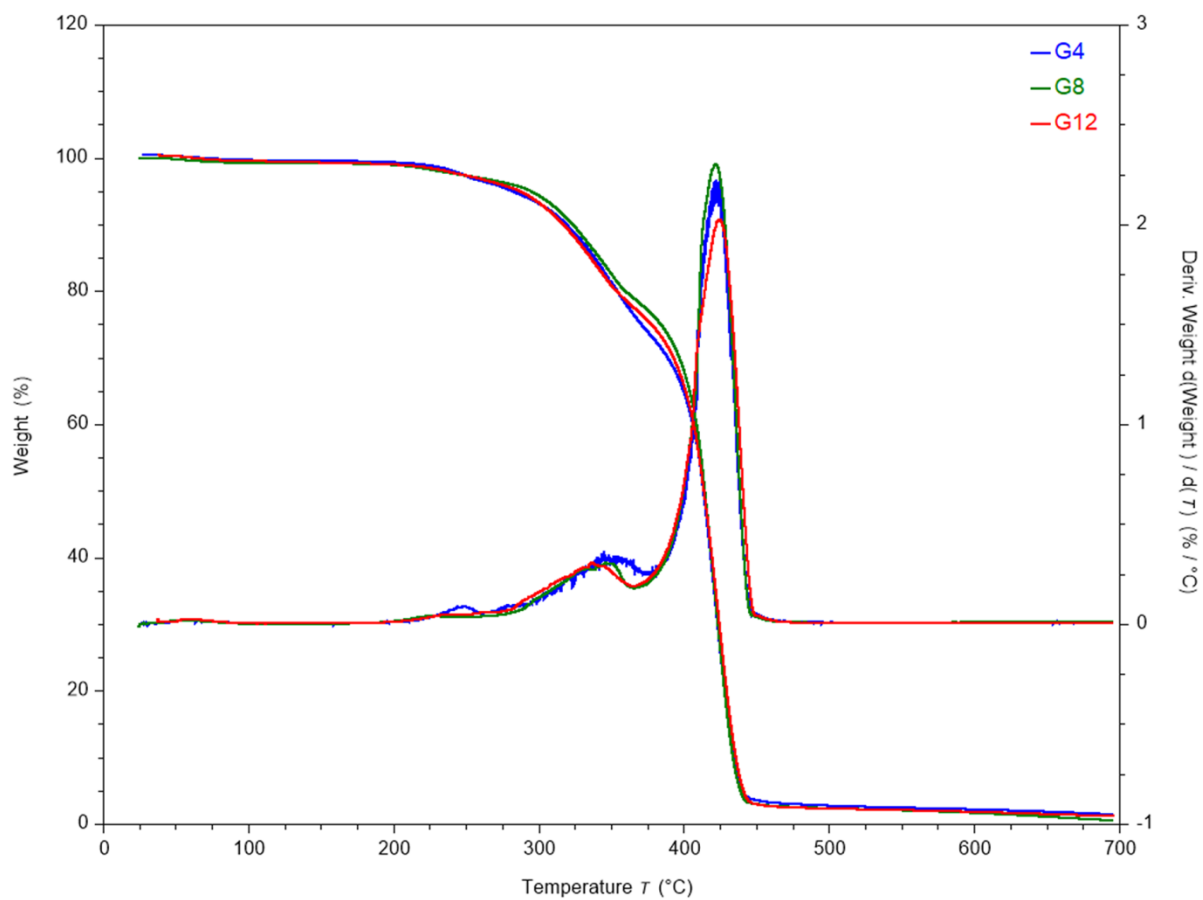

**Figure S6.** The thermal degradation curves obtained for the CDLA-PEG samples

### Dependence of swelling degree on temperature

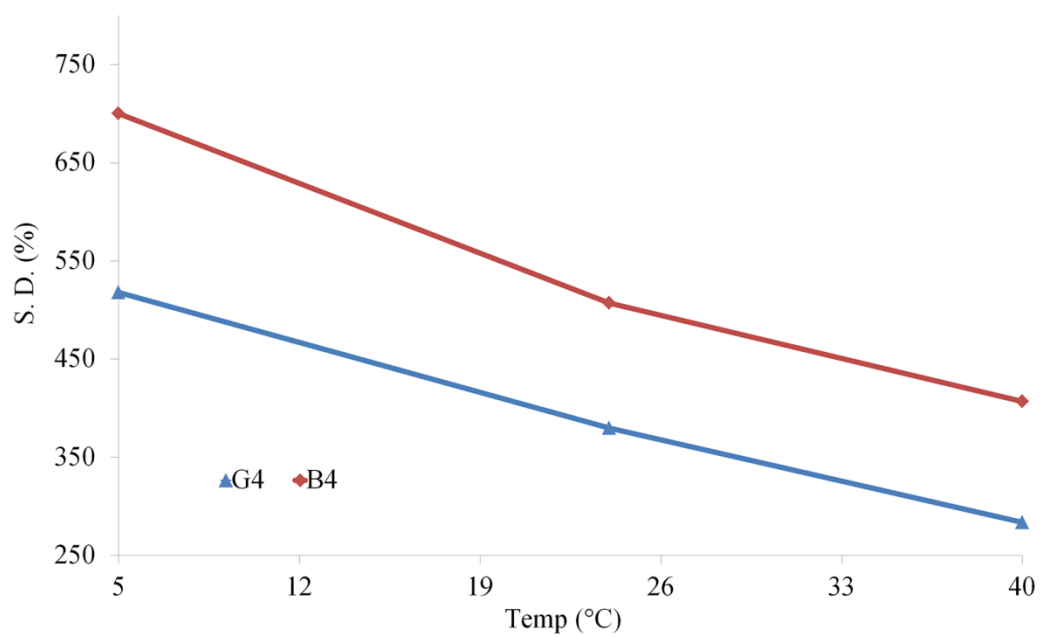

**Figure S7.** Dependence of swelling degree on temperature of CD-PEG (B4) and CDLA-PEG (G4) hydrogels

## Hydrolytic degradation of hydrogels

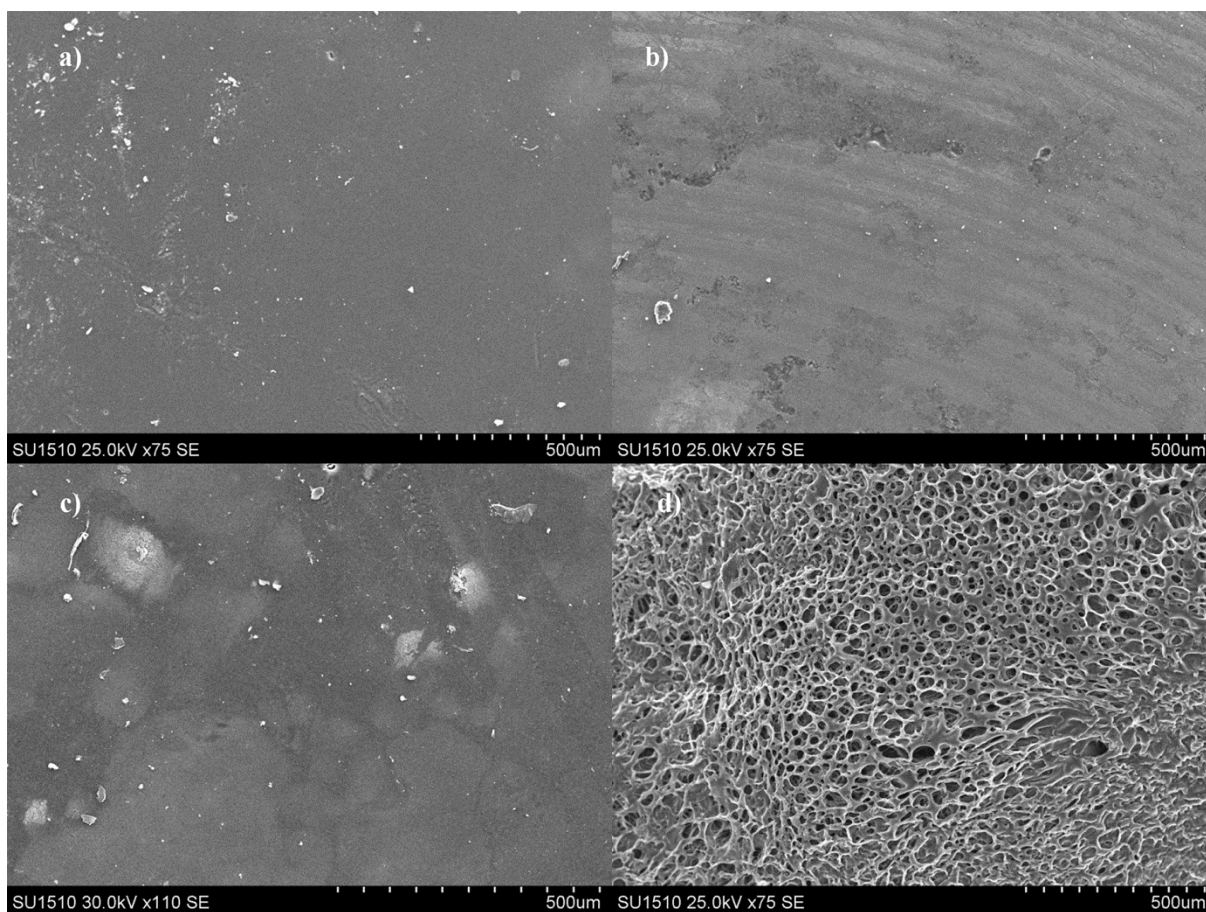

**Figure S8.** Surface micrographs for CD-PEG – (a) B8 initial, (b) B8 after 193 days, and CDLA-PEG – (c) G4 initial, (d) G4 after 193 days

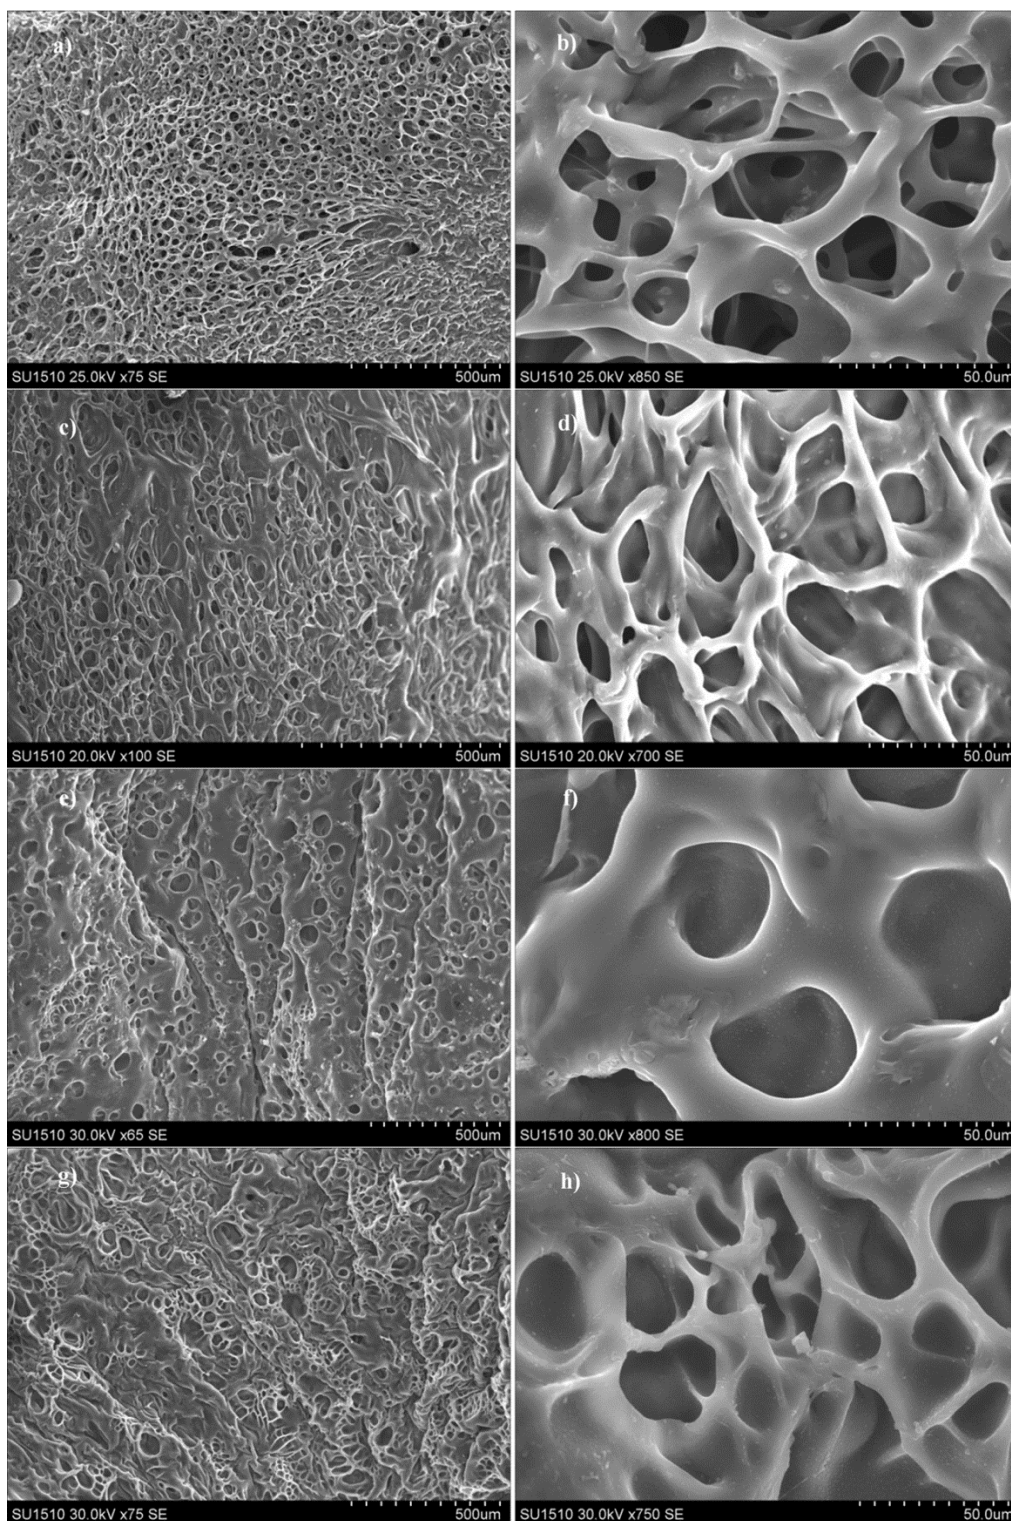

**Figure S9.** Surface micrographs after 193 days of degradation for CDLA-PEG: G4 at (a) 500μm and (b) 50μm, G8 at (c) 500μm and (d) 50μm, G10 at (e) 500μm and (f) 50μm, G12 at (g) 500μm and (h) 50μm

## References

1. Hădărugă, N.G.; Bandur, G.N.; Hădărugă, D.I. 4. Thermal Analyses of Cyclodextrin Complexes. In *Cyclodextrin Fundamentals, Reactivity and Analysis, series Environmental Chemistry for a Sustainable World*; Fourmentin, S., Crini, G., Lichtfouse, E., Eds.; Springer International Publishing, 2018; pp. 155-221.
2. Éhen, Z.; Giordano, F.; Sztatisz, J.; Jicsinszky, L.; Novák, Cs. Thermal characterization of natural and modified cyclodextrins using TG-MS combined technique. *J. Therm. Anal. Calorim.* **2005**, *80*, 419-424.
